# Supplementary material for: Multiple-Choice Exams: An Obstacle for Higher-Level Thinking in Introductory Science Classes
Source: Atypon-hosted journal article supplement (doi:10.1187/cbe.11-11-0100), 2012-09-01
Supplement: combinedsupmats2.pdf [file combinedsupmats2.pdf]

**Supplement 1: Question examples for questions asked in both SA and MC formats.** Blue: Lower Bloom levels (this was discussed in class or given as assignment). Yellow: Higher Bloom levels (these examples were not discussed or assigned and required transfer of learned material). \* Answer options were designed to include correct but incomplete answers (considering only SA or V), one correct and complete answer (SA and V: correct relationship), an irrelevant answer (for this question), and a complete but incorrect answer (SA and V: incorrect relationship). See Supplement 2 for the short answer grading rubric.

| Skill (Bloom)                                                                       | Written Response Question                                                                                                                                                                                   | MC Question(s)                                                                                                                                                                                                                                                                                                                                                                                                                                                        |
|-------------------------------------------------------------------------------------|-------------------------------------------------------------------------------------------------------------------------------------------------------------------------------------------------------------|-----------------------------------------------------------------------------------------------------------------------------------------------------------------------------------------------------------------------------------------------------------------------------------------------------------------------------------------------------------------------------------------------------------------------------------------------------------------------|
| <b>Remembering</b><br>(remembering facts, which were discussed in class).           | Which are the closest relatives of Archae?                                                                                                                                                                  | Which are the closest relatives of Archae?<br>a. Bacteria<br>b. Protists<br>c. Protist, plants & animals<br>d. Eukaryotes<br>e. Protists & plants                                                                                                                                                                                                                                                                                                                     |
| <b>Understanding</b><br>(remembering an explanation, which was discussed in class). | What is the function of endosperm tissue in plants? (please explain in one sentence)                                                                                                                        | What is the function of endosperm tissue in plants?<br>a. to aid in fertilization<br>b. to form a seed cover<br>c. to form a fruit<br>d. to aid in pollination<br>e. to store starch                                                                                                                                                                                                                                                                                  |
| <b>Application</b><br>This example (figure and taxa) was not used in class.         | Based on this molecular phylogeny (Figure), which are the closest relatives of Cnidaria?                                                                                                                    | Based on this molecular phylogeny (Figure), which are the closest relatives of Cnidaria?<br>a. Acoela<br>b. Platyhelminthes<br>c. Eumetazoa<br>d. Ctenophora<br>e. Bilateria                                                                                                                                                                                                                                                                                          |
| <b>Application</b><br>This example (situation) was not used in class.               | A small and a large turtle both have a body temperature of 12° C. They glide into the water of a pond, which has a temperature of 20° C. Which turtle will reach the water temperature faster? Explain why. | A small and a large turtle both have a body temperature of 12° C. They glide into the water of a pond, which has a temperature of 20° C. Which turtle will reach the water temperature faster?<br>a. smaller<br>b. larger<br>c. both at the same time<br><br>This answer is correct, because*<br>a. the larger turtle has a larger SA<br>b. the smaller turtle has a smaller volume<br>c. they are both ectotherms<br>d. the SA/V is smaller<br>e. the SA/V is larger |

|                                                                   |                                                                                                                                    |                                                                                                                                                                                                                                                                    |
|-------------------------------------------------------------------|------------------------------------------------------------------------------------------------------------------------------------|--------------------------------------------------------------------------------------------------------------------------------------------------------------------------------------------------------------------------------------------------------------------|
| <p><b>Analysis</b><br/>This comparison was not made in class.</p> | <p>Which plant structure is equivalent (in structure and function) to the amniotic egg in animals? Be as specific as possible.</p> | <p>Which of the following plant structures is equivalent (in structure and function) to the amniotic egg in animals?</p> <ul style="list-style-type: none"><li>a. gametophyte</li><li>b. ovary</li><li>c. egg cell</li><li>d. embryo sac</li><li>e. seed</li></ul> |
|-------------------------------------------------------------------|------------------------------------------------------------------------------------------------------------------------------------|--------------------------------------------------------------------------------------------------------------------------------------------------------------------------------------------------------------------------------------------------------------------|
