# Supplementary material for: Multiple-Choice Exams: An Obstacle for Higher-Level Thinking in Introductory Science Classes
Source: Atypon-hosted journal article supplement (doi:10.1187/cbe.11-11-0100), 2012-09-01
Supplement: combinedsupmats3.pdf [file combinedsupmats3.pdf]

**Supplement 2: Sample grading rubric for the turtle question from supplement 1 (application of SA/V ratio principle). This example was not used in class.**

**Q: A small and a large turtle both have a body temperature of 12° C. They glide into the water of a pond, which has a temperature of 20° C. Which turtle will reach the water temperature faster? Explain why.**

**The correct answer has 4 components:**

Different versions are accepted as long as the key components are present somewhere in the answer (for example components 2 and 3 are often combined: see below):

1. Model (recognition of principle):

e.g. As organisms increase in size, their volume (V) increases faster than their surface area (SA) (or: their SA/V decreases).

2. Relate model components (SA, V) to structure and function in the question context:

e.g. SA: the SA of the turtle is used for heat exchange; V: the turtle volume/body is warmed up.

3. Combine principle with question context:

e.g. The large turtle has relatively less SA (scaled by volume) [to take up heat = component 2] or: relatively more volume (scaled by surface area) [to be warmed up = component 2].

4. Conclusion (reasoned out answer to question):

e.g. As a result, the smaller turtle reaches 20° C faster than the larger turtle.

Partial credit for partial answers:

*Ignored SA:*

Larger turtle needs to heat up more volume (or: smaller turtle needs to heat up less volume).

*Ignored Volume:*

Larger turtle has more SA to take up heat (or: smaller turtle has less SA to take up heat).

No credit (unspecific, ambiguous, or wrong examples):

Smaller turtles need less heat to warm up. Smaller turtles are more effective. The larger turtle has a larger SA/V.
